# Supplementary material
Source: PubMed Central journal article supplement (PMC193572)

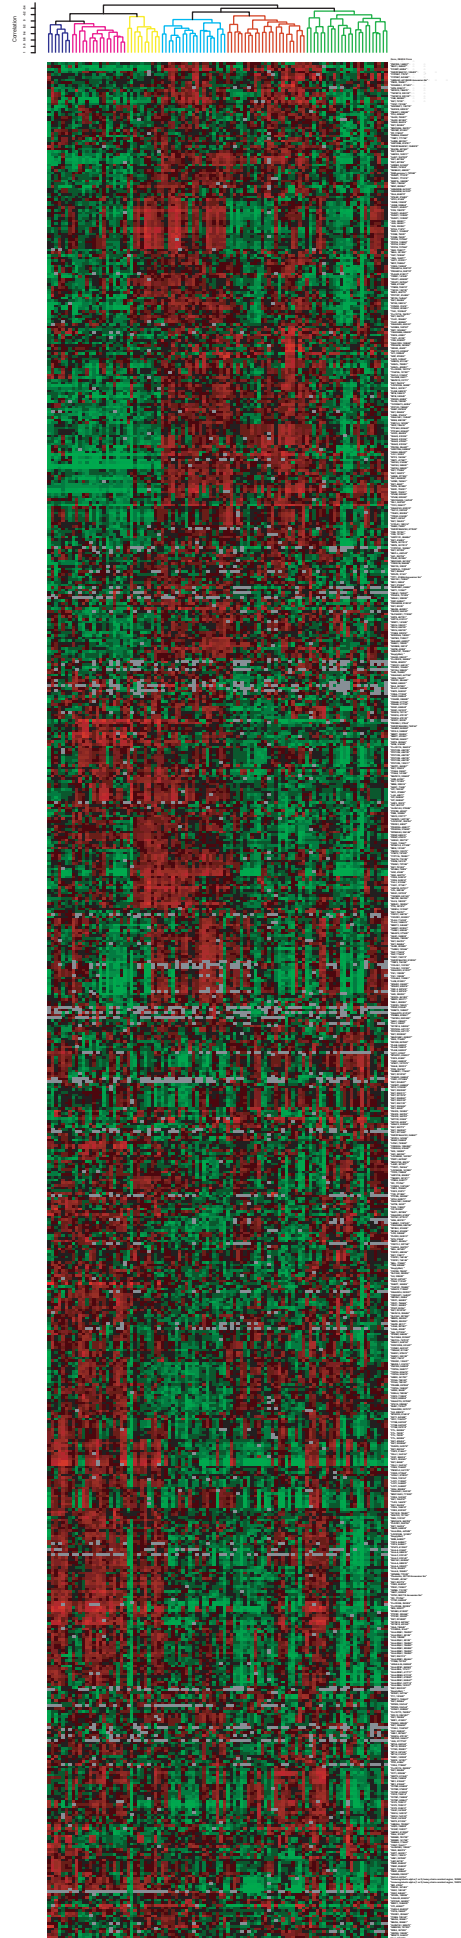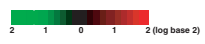

Supplement: pnas_1732912100_11.pdf [file pnas_1732912100_11.pdf]

**A**

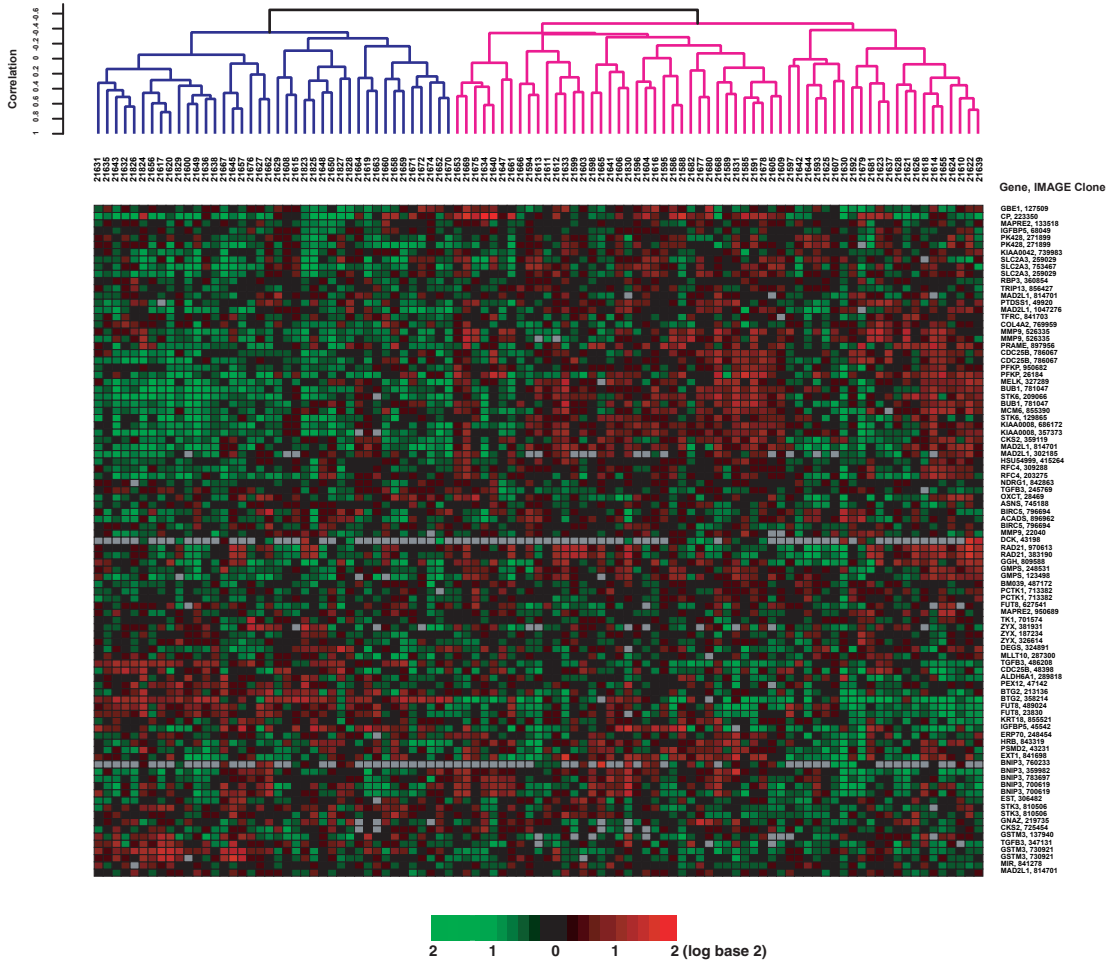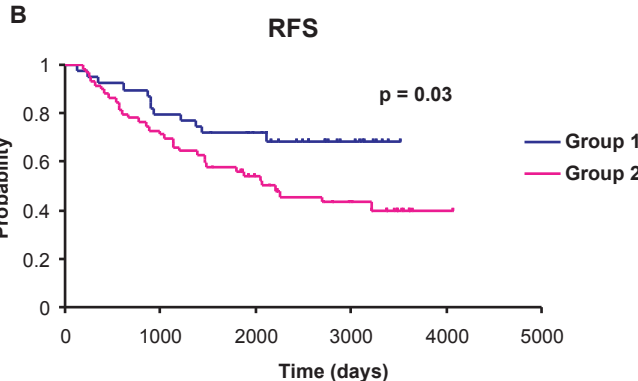

Supplement: pnas_1732912100_3.pdf [file pnas_1732912100_3.pdf]

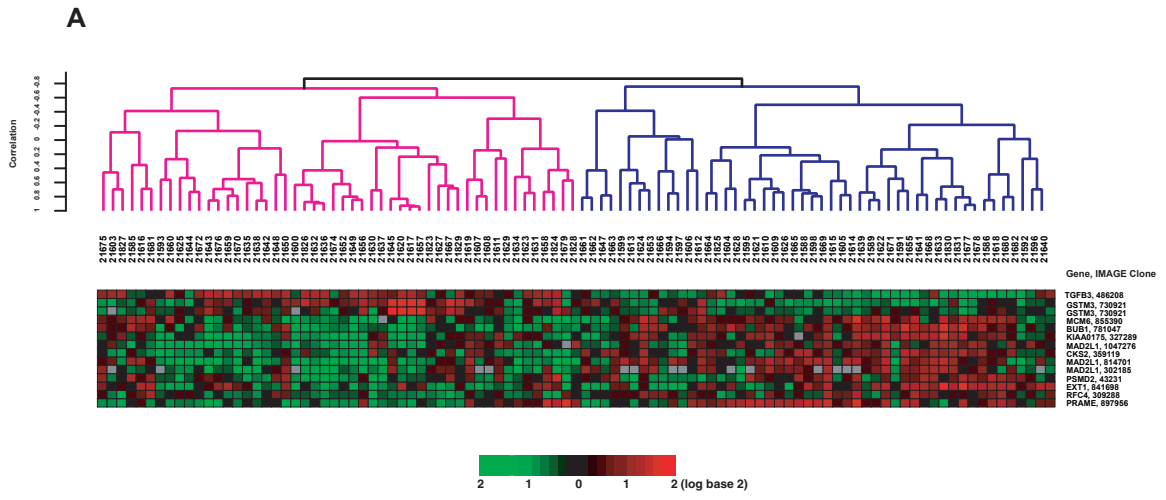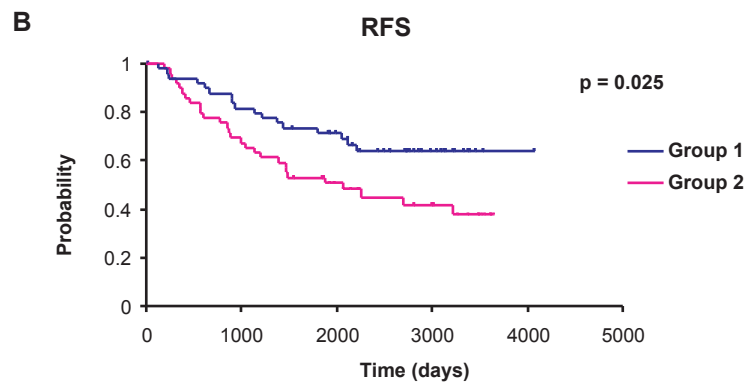

Supplement: pnas_1732912100_5.pdf [file pnas_1732912100_5.pdf]

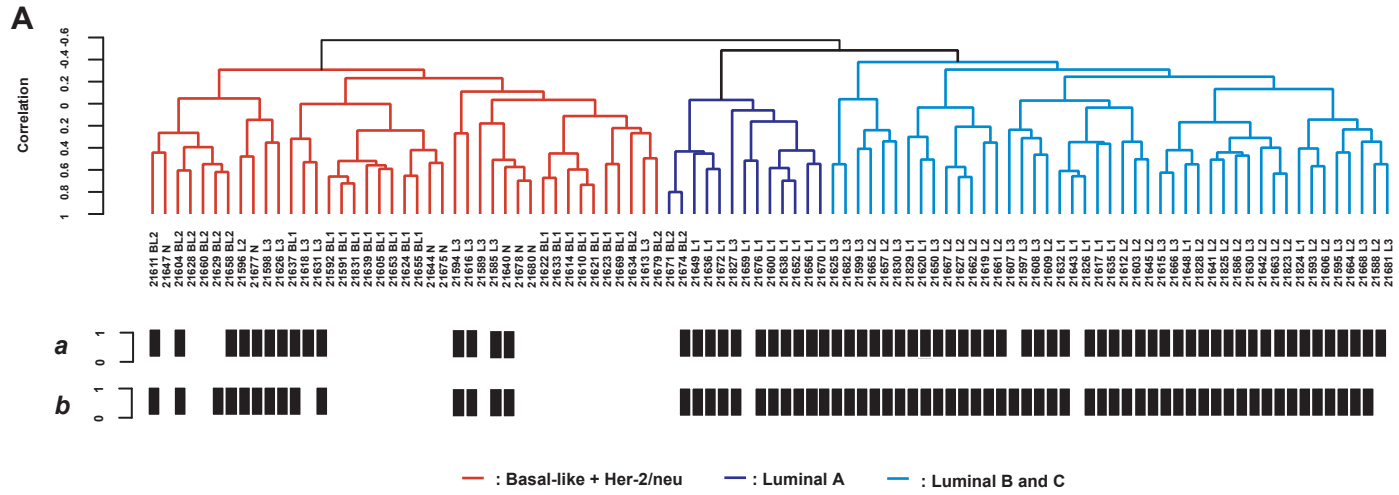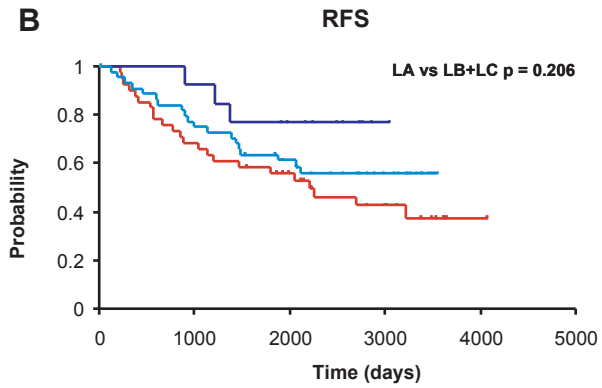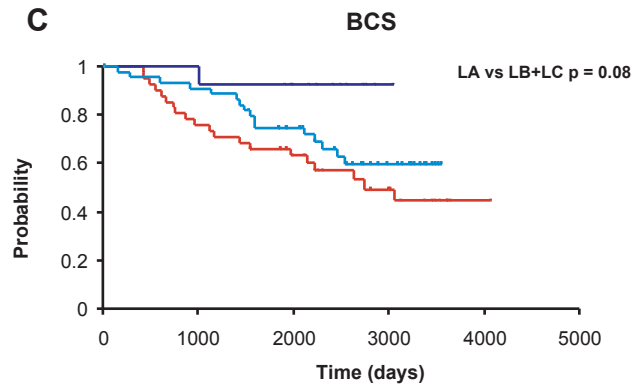

Supplement: pnas_1732912100_9.pdf [file pnas_1732912100_9.pdf]
